# Supplementary material for: Genetic diversity and recombination analysis of sweepoviruses from Brazil
Source: PubMed Central journal article supplement (PMC3485178; doi:10.1186/1743-422x-9-241), 2012-10-20
Supplement: 1743-422X-9-241-S1.pdf [file 1743-422X-9-241-S1.pdf]

I →
II →
III →

SPLCV-BR [ BR:BA:CA:08 ] GCCATTTGGTGA CACTCAGACTTTCAAAT-GAATTGGTG--ACTGGTGAC 2716  
 SPLCV-BR [ BR:RO:Cac:08 ] GCCATTTGGTGA CACTCAGACTTTCAAAT-GAATTGGTG--ACTGGTGAC 2716  
 SPLCV-BR [ BR:SE:Ria:08 ] GCCATTTGGTGA CACTCAGACTTTCAAAT-GAATTGGTG--ACTGGTGAC 2716  
 SPLCV-BR [ BR:RO:OPO:08 ] GCCATTTGGTGA CACTCAGACTTTCAAAT-GAATTGGTG--ACTGGTGAC 2716  
 SPLCV-BR [ BR:BA:Uru:08 ] GCCATTTGGAGACA ACCACTAGTTCAAAT-GAATTGGAG--ACTGGAGAC 2715  
 SPLCV-PE [ BR:PE:CSF1:08 ] GCCATTTGGAGACA ATCAATAATTCAAAT-GAATTGGAG--ACTGGAGAC 2716  
 SPLCV-PE [ BR:PE:CSF2:08 ] GCCATTTGGAGACA ATCAATAATTCAAAT-GAATTGGAG--ACTGGAGAC 2716  
 SPLCV-PE [ BR:RS:MP7:09 ] GCCATTTGGAGACA ATCACTAGTTCAAAT-GAATTGGAG--ACTGGAGAC 2715  
 SPLCV-PE [ BR:RS:MP3:09 ] GCCATTTGGAGACA ATCACTAGTTCAAAT-GAATTGGAG--ACTGGAGAC 2715  
 SPLCV-PE [ BR:RS:MP6:09 ] GCCATTTGGAGACA ATCACTAGTTCAAAT-GAATTGGAG--ACTGGAGAC 2715  
 SPLCV-PE [ BR:RS:MP4:09 ] GCCATTTGGAGACA ATCACTAGTTCAAAT-GAATTGGAG--ACTGGAGAC 2716  
 SPLCV-PE [ BR:PB:PF:08 ] GCCATTTGGAGACA ATCATAATTTCAAAT-GAATTGGAG--ACTGGAGAC 2717  
 SPLCV-PE [ BR:RS:MP1:09 ] GCCATTTGGTGA CACTCATACTTTCAAAT-GAATTGGTG--ACTGGTGAC 2717  
 SPLCV-PE [ BR:RS:MP2:09 ] GCCATTTGGTGA CACTCATACTTTCAAAT-GAATTGGTG--ACTGGTGAC 2717  
 SPLCV-PE [ BR:RS:MP5:09 ] GCCATTTGGTGA CACTGATACTTTCAAAT-GAATTGGTG--ACTGGTGAC 2716  
 SPLCV-PE [ BR:RO:PV:08 ] GCCATTTGGTGA CACTCAGACTTTCAAATGAATTGGTG--ACTGGTGAC 2717  
 SPLCV-US [ BR:RO:OPO:08 ] GCCATTTGGTGA CACTCAGACTTTCAAAT-GAATTGGTG--ACTGGTGAC 2717  
 SPLCV-US [ BR:BA:CA1:08 ] GCCATTTGGAGACACGCATAAGTTCAAAT-GAATTGGAG--ACTGGAGAC 2717  
 SPLCV-US [ BR:PA:08 ] GCCATTTGGAGACACGCATAAGTTCAAAT-GAATTGGAG--ACTGGAGAC 2717  
 SPLCV-US [ BR:BA:CA2:08 ] GCCATTTGGAGACACGCATAAGTTCAAAT-GAATTGGAG--ACTGGAGAC 2717  
 SPLCV-US [ BR:RO:PV:08 ] GCCATTTGGAGACACGCATAAGTTCAAAT-GAATTGGAG--ACTGGAGAC 2717  
 SPLCV-US [ BR:SP:AM1:09 ] GCCATTTGGAGACACGCATAAGTTCAAAT-GAATTGGAG--ACTGGAGAC 2717  
 SPLCV-US [ BR:SP:AM2:09 ] GCCATTTGGAGACACGCATAAGTTCAAAT-GAATTGGAG--ACTGGAGAC 2717  
 SPLCV-US [ BR:SP:AM3:09 ] GCCATTTGGAGACACGCATAAGTTCAAAT-GAATTGGAG--ACTGGAGAC 2717  
 SPLCV-US [ BR:SP:AM4:09 ] GCCATTTGGAGACACGCATAAGTTCAAAT-GAATTGGAG--ACTGGAGAC 2715  
 SPLCV-SP [ BR:SP:PP:09 ] GTCAAATGGTGG-ACACAAAACTCTATATGAATTGGTGAACGGTGGAC 2733  
 SPGVV-RO [ BR:BA:Uti:08 ] ATCAATGGGTGG-ACACACAAACTCTATATGAATTGGTGAAGGGTGGC 2730  
 SPGVV-RO [ BR:RO:PV1:08 ] AGCTATGGGTGG-ACACACAAACTCTATATGAATTGGTGAAGGGTGGAC 2731  
 SPGVV-RO [ BR:RO:Cac:08 ] AGCAATGGGTGG-ACACACAAACTCTATATGAATTGGTGAAGGGTGGAC 2730  
 SPGVV-RO [ BR:RO:OPO:08 ] AGCAATGGGTGG-ACACACAAACTCTATATGAATTGGTGAAGGGTGGAC 2730  
 SPGVV-RO [ BR:RO:PV2:08 ] AGCAATGGGTGG-ACACACAAACTCTATATGAATTGGTGAAGGGTGGAC 2730  
 SPLCESV- [ BR:BA:Uti:08 ] ATCAATGGGTGG-ACACACAAACTCTATATGAATTGGTGAAGGGTGGC 2675  
 SPLCESV- [ BR:RO:Cac:08 ] AGCAATGGGTGG-ACACACAAACTCTATATGAATTGGTGAAGGGTGGAC 2714  
 SPGVV-PB [ BR:BA:CA:08 ] AGCAATGGGTGG-ACACACAAACTCTATATGAATTGGTGAAGGGTGGAC 2730  

. \* : : \* \* : \* . \* : . \* \* : : \* \* \* \* \* : \* \* \* \* \*

← IV
Rep IRD

SPLCV-BR [ BR:BA:CA:08 ] AATTTATACTATGTCACCAAATGGCATTTTGGTAATTTAGAAGATCCTTT 2766 MAPPKRFRIS  
 SPLCV-BR [ BR:RO:Cac:08 ] AATTTATACTATGTCACCAAATGGCATTTTGGTAATTTAGAAGATCCTTT 2766 MAPPKRFRIS  
**SPLCV-BR [ BR:SE:Ria:08 ] AATTTATACTATGTCACCAAATGGCATTTTGGTAATTTAGAAGATCCTTT 2766 MATPKRFRIS**  
 SPLCV-BR [ BR:RO:OPO:08 ] AATTTATACTATGTCACCAAATGGCATTTTGGTAATTTAGAAGATCCTTT 2766 MAPPKRFRIS

|                                  |               |       |                        |                         |      |                   |
|----------------------------------|---------------|-------|------------------------|-------------------------|------|-------------------|
| SPLCV-BR [ BR:BA:Uru:08 ]        | AATATATAGTATG | TCTCC | AAATGGCATT             | TTTGGTAATTTAGAAGATCCTTT | 2765 | MAPPKRFKIQ        |
| SPLCV-PE [ BR:PE:CSF:09 ]        | AATATATAGTATG | TCTCC | AAATGGCATT             | TTTGGTAATTTAGAAGATCCTTT | 2766 | MAPPKRFKIQ        |
| SPLCV-PE [ BR:PE:CSF:09 ]        | AATATATAGTATG | TCTCC | AAATGGCATT             | TTTGGTAATTTAGAAGATCCTTT | 2766 | MAPPKRFKIQ        |
| SPLCV-PE [ BR:RS:MP7:09 ]        | AATATATAGTATG | TCTCC | AAATGGCATT             | TTTGGTAATTTAGAAGATCCTTT | 2765 | MAPPKRFKIQ        |
| SPLCV-PE [ BR:RS:MP3:09 ]        | AATATATAGTATG | TCTCC | AAATGGCATT             | TTTGGTAATTTAGAAGATCCTTT | 2765 | MAPPKRFKIQ        |
| SPLCV-PE [ BR:RS:MP6:09 ]        | AATATATAGTATG | TCTCC | AAATGGCATT             | TTTGGTAATTTAGAAGATCCTTT | 2765 | MAPPKRFKIQ        |
| SPLCV-PE [ BR:RS:MP4:09 ]        | AATATATAATATG | TCTCC | AAATGGCATT             | TTTGGTAATTTAGAAGATCCTTT | 2766 | MAPPKRFKIQ        |
| SPLCV-PE [ BR:RS:PF:09 ]         | AATATATAGTATG | TCTCC | AAATGGCATT             | TTTGGTAATTTAGAAGATCCTTT | 2767 | MAPPKRFKIQ        |
| SPLCV-PE [ BR:RS:MP1:09 ]        | AATTTATACTATG | TCACC | AAATGGCATT             | TTTGGTAATTTAGAAGATCCTTT | 2767 | MAPPKRFKIQ        |
| SPLCV-PE [ BR:RS:MP2:09 ]        | AATTTATACTATG | TCACC | AAATGGCATT             | TTTGGTAATTTAGAAGATCCTTT | 2767 | MAPPKRFKIQ        |
| SPLCV-PE [ BR:RS:MP5:09 ]        | AATTTATACTATG | TCACC | AAATGGCATT             | TTTGGTAATTTAGAAGATCCTTT | 2766 | MAPPKRFKIQ        |
| SPLCV-PE [ BR:RO:PV:08 ]         | AATTTATACTATG | TCACC | AAATGGCATT             | TTTGGTAATTTAGAAGATCCTTT | 2767 | MAPPKRFKIQ        |
| SPLCV-US [ BR:RO:OPO:08 ]        | AATTTATACTATG | TCACC | AAATGGCATT             | TTTGGTAATTTAGAAGATCCTTT | 2767 | MAPPKRFKIQ        |
| SPLCV-US [ BR:BA:CA1:08 ]        | AATATATAGTATG | TCTCC | AAATGGCATT             | CTGGTAATTTAGAAGATCCTTT  | 2767 | MAPPKRFKIQ        |
| SPLCV-US [ BR:PA:08 ]            | AATATATAGTATG | TCTCC | AAATGGCATT             | CTGGTAATTTAGAAGATCCTTT  | 2767 | MAPPKRFKIQ        |
| <b>SPLCV-US [ BR:BA:CA2:08 ]</b> | AATATATAGTATG | TCTCC | AAATGGCATT             | CTGGTAATTTAGAAGATCCTTT  | 2767 | <b>MAPPNRFKIQ</b> |
| SPLCV-US [ BR:RO:PV:08 ]         | AATATATAGTATG | TCTCC | AAATGGCATT             | CTGGTAATTTAGAAGATCCTTT  | 2767 | MAPPKRFKIQ        |
| SPLCV-US [ BR:SP:AM1:09 ]        | AATATATAGTATG | TCTCC | AAATGGCATT             | CTGGTAATTTAGAAGATCCTTT  | 2767 | MAPPKRFKIQ        |
| SPLCV-US [ BR:SP:AM2:09 ]        | AATATATAGTATG | TCTCC | AAATGGCATT             | CTGGTAATTTAGAAGATCCTTT  | 2767 | MAPPKRFKIQ        |
| SPLCV-US [ BR:SP:AM3:09 ]        | AATATATAGTATG | TCTCC | AAATGGCATT             | CTGGTAATTTAGAAGATCCTTT  | 2767 | MAPPKRFKIQ        |
| SPLCV-US [ BR:SP:AM4:09 ]        | AATATATAGTATG | TCTCC | AAATGGCATT             | CTGGTAATTTAGAAGATCCTTT  | 2765 | MAPPKRFKIQ        |
| SPLCV-SP [ BR:SP:PP:09 ]         | AATTTATATGTGT | CCACC | AAATGGCAAATTGGTAATTTAG | --GTAACCTTT             | 2781 | MPRAGRFNIN        |
| SPGVV-RO [ BR:BA:Uti:08 ]        | AATTTATATGTGT | CCACC | TAATGGCATT             | TTTGGTAATTAG-----AA     | 2771 | MPRAGRFNIN        |
| SPGVV-RO [ BR:RO:PV1:08 ]        | AATTTATATGTGT | CCACC | TAATGGCATT             | TTTGGTAATTAG-----AA     | 2772 | MPRAGRFNIN        |
| SPGVV-RO [ BR:RO:Cac:08 ]        | AATATATATGTGT | CCACC | TAATGGCATT             | TTTGGTAATTAG-----AA     | 2771 | MPRAGRFNIN        |
| SPGVV-RO [ BR:RO:OPO:08 ]        | AATTTATATGTGT | CCACC | TAATGGCATT             | TTTGGTAATTAG-----AA     | 2771 | MPRAGRFNIN        |
| SPGVV-RO [ BR:RO:PV2:08 ]        | AATTTATATGTGT | CCACC | TAATGGCATT             | TTTGGTAATTTAGAAGATCCTTT | 2780 | MPRAGRFNIN        |
| <b>SPLCESV- [ BR:BA:Uti:08 ]</b> | AATTTATATGTGT | CCACC | TAATGGCATT             | TTTGGTAATTAG-----AA     | 2716 | MPRAGRFNIN        |
| SPLCESV- [ BR:RO:Cac:08 ]        | AATATATATGTGT | CCACC | TAATGGCATT             | TTTGGTAATTAG-----AA     | 2755 | MPRAGRFNIN        |
| SPGVV-PB [ BR:CA:08 ]            | AATTTATATGTGT | CCACC | TAATGGCATT             | TTTGGTAATTAG-----AA     | 2771 | MPRAGRFNIN        |

\*\*\*:\*\*\* : \*::\*\*\*\*\*: \* \*\*\*\*\*:
